# Supplementary material for: AAV-mediated base editing restores cochlear gap junction in GJB2 dominant-negative mutation-associated syndromic hearing loss model
Source: JCI journal article supplement (doi:10.1172/jci.insight.185193), 2025-03-09

Full unedited blotgel for Supplementary Figure 2B

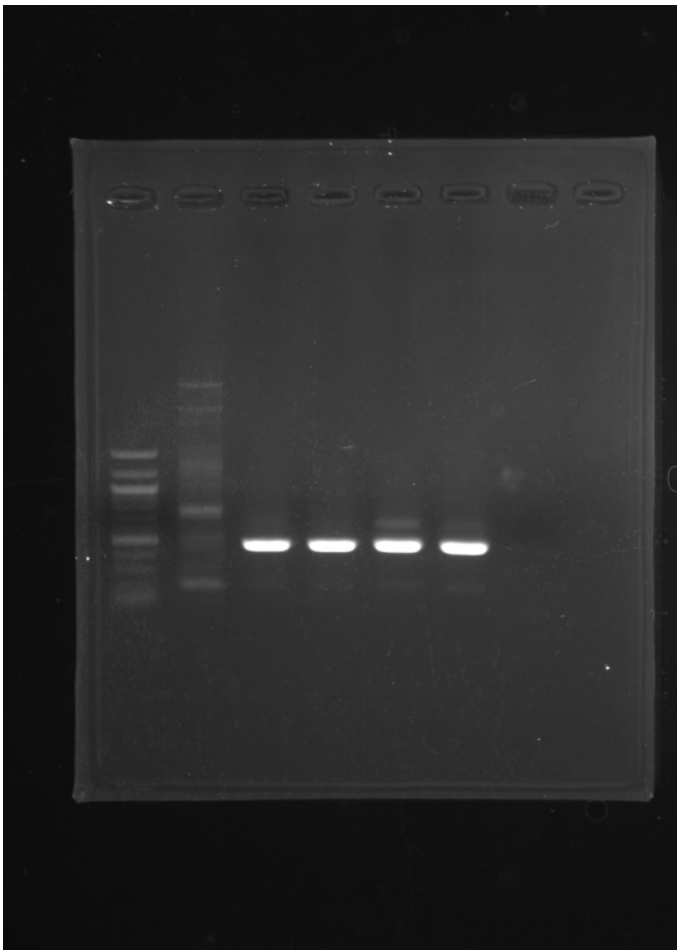

Supplement: sd2 [file 2]
